# Supplementary material for: Variations in Fibrinogen-like 1 (FGL1) Gene Locus as a Genetic Marker Related to Fat Deposition Based on Pig Model and Liver RNA-Seq Data
Source: MDPI journal article supplement (doi:10.3390/genes13081419), 2022-08-09
Supplement: s1 [file s1]

**Table S1.** Primers used in study

| Gene                     | Primers                                                                                                             | Method                         | Restriction enzyme |
|--------------------------|---------------------------------------------------------------------------------------------------------------------|--------------------------------|--------------------|
| rs330493983              | F- TTGGAATGTTACATGTGTGTTA<br>R- ATCTATGCTATGTTATCTCCCCAGTC<br>F-TGGGCTTTCATTCAGCAG<br>R- TTAAGTGATAAAGGCAGTTAAGAACG | PCR-ACRS<br><br>DNA sequencing | <i>Hpy166II</i>    |
| rs340465447              | F-GGCAATATGGCTTAGTGATCC<br>R-TGAAGTAGGCATTAAGGGACAA                                                                 | PCR-RFLP, DNA sequencing       | <i>NlaIII</i>      |
| 17:5548991<br>17:5549161 | F-TGAACACAGGTCTCTGACTGC<br>R- AAAGCTAATAAGTAGGGGAACAAGG                                                             | DNA sequencing                 |                    |

**Table S2.** Characteristic of porcine liver transcriptome in the context of identified mutations

| Mutation<br>(variant)             | Quantity |                |
|-----------------------------------|----------|----------------|
|                                   | total    | $\chi^2$ test* |
| Total                             | 103.792  | 7249           |
| Know variant % (having rs number) | 73.8     | 82.2           |
| Analyzed transcript               | 14152    | 3322           |
| Heterozygosity %                  | 42.5     | -              |
| Insertion                         | 3.648    | 202            |
| Deletion                          | 3.818    | 154            |
| SNP                               | 96.325   | 6.893          |
| High effect                       | 3927     | 70             |
| Low effect                        | 12.854   | 998            |
| Moderate effect                   | 5.250    | 376            |
| Missense variant                  | 5.073    | 371            |
| Silent variant                    | 11.241   | 914            |
| 3'UTR                             | 32.574   | 2.403          |
| 5'UTR premature start codon       | 776      | 52             |
| 5'UTR                             | 4.980    | 305            |
| Frameshift variant                | 1.596    | 45             |
| Splice region variant             | 3.267    | 91             |
| Inframe variant                   | 436      | 4              |
| Downstream gene                   | 31.327   | 2.100          |
| Upstream gene                     | 15.830   | 933            |
| Intergenic region                 | 9.349    | 689            |
| Intron                            | 52.409   | 3.537          |
| Start lost                        | 11       | 1              |
| Stop gain                         | 48       | 3              |
| Stop lost                         | 36       | 1              |

Abbreviation: \* significant differences based on  $\chi^2$  test in genotype distribution between HFD and LFD groups. High, moderate and low effects - it is power of effect on protein expression, amino acid sequence and phenotype. Definition of high, low and moderate effects is given at link [http://snpeff.sourceforge.net/SnpEff\\_manual.html](http://snpeff.sourceforge.net/SnpEff_manual.html)

**Table S3.** Potential changes in miRNA binding sites identified by miRBase dependent on mutations in 3'UTR region of *FGL1* gene in pigs

| FGL1 3'UTR<br>mutation   | Mutation<br>type | miRNA binding                                                                                                                                                                                                                                                                                                                                                  |
|--------------------------|------------------|----------------------------------------------------------------------------------------------------------------------------------------------------------------------------------------------------------------------------------------------------------------------------------------------------------------------------------------------------------------|
| NC_010459.5:g.17:5548991 | G/TGCTG          | eca-miR-8979, gga-miR-6714-3p, gga-miR-1637, bdi-miR7787-3p                                                                                                                                                                                                                                                                                                    |
| NC_010459.5:g.17:5549161 | TGA/A            | cel-miR-84-5p, ptc-miR478h, ptc-miR478i, ptc-miR478j, ptc-miR478k, ptc-miR478l, ptc-miR478m, ptc-miR478o, ptc-miR478q, ptc-miR478r, ptc-miR478s, ptc-miR478n, gra-miR7584e, bmo-miR-2769                                                                                                                                                                       |
| rs330160051              | A/G              | bmo-miR-2843-2-3p, cfa-miR-8839, mmu-miR-7004-5p, gga-miR-12251-3p, mmu-miR-6918-3p, ipu-miR-7563c, mdo-miR-1545f-3p                                                                                                                                                                                                                                           |
| rs323686683              | T/A              | gra-miR8661, dme-miR-969-5p, dsi-miR-969-5p, mmu-miR-7078-3p, hsa-miR-4661-5p                                                                                                                                                                                                                                                                                  |
| rs343100846              | A/G              | emu-miR-10-3p, pma-miR-4602, gga-miR-6605-5p, egr-miR-10a-3p, mmu-miR-375-5p, rno-miR-375-5p, hsa-miR-375-5p, pal-miR-375-5p, cpo-miR-375-5p, dno-miR-375-5p, ocu-miR-375-5p                                                                                                                                                                                   |
| rs335115749              | T/C              | tca-miR-3867-5p, osa-miR5819                                                                                                                                                                                                                                                                                                                                   |
| <b>rs340465447</b>       | C/T              | gra-miR8705, pal-miR-7140-3p, mmu-miR-6715-5p, pal-miR-7140-5p, bmo-miR-3309                                                                                                                                                                                                                                                                                   |
| rs337843321              | G/T              | hpo-miR-72-3p, cpi-miR-9589-5p                                                                                                                                                                                                                                                                                                                                 |
| rs346334155              | G/A              | hco-miR-5958                                                                                                                                                                                                                                                                                                                                                   |
| <b>rs330493983</b>       | G/A              | mmu-miR-489-5p, mmu-miR-669a-3-3p, ame-miR-190-5p, ppc-miR-8356a-3p, <b>rno-miR-338-3p, mdo-miR-338, cfa-miR-338, bta-miR-338, mmu-miR-3065-5p, hsa-miR-3065-5p, rno-miR-3065-5p, cgr-miR-338, ggo-miR-338, oha-miR-338-3p, gga-miR-338-3p, cpi-miR-338a-3p, cli-miR-338b-3p, pbv-miR-338-3p, pal-miR-338-3p, bta-miR-3065, cpo-miR-338-3p, dno-miR-338-3p</b> |
| rs318501380              | T/C              | aga-miR-10374-3p, bdi-miR5057, hco-miR-5971, sme-miR-1c-5p, str-miR-8374-5p                                                                                                                                                                                                                                                                                    |
| rs331540240              | T/G              | lca-miR-15a, ppa-miR-15b, sla-miR-15a                                                                                                                                                                                                                                                                                                                          |
| rs337942094              | T/C              | aca-miR-1677b-5p, oha-miR-1677b-5p, pbv-miR-1677-5p, abu-miR-24c, <b>hsa-miR-4686</b>                                                                                                                                                                                                                                                                          |
|                          |                  | <b>emu-miR-31-3p</b> , mdo-miR-12407-3p, oni-miR-10707, bta-miR-431, eca-miR-431                                                                                                                                                                                                                                                                               |
|                          |                  | eca-miR-9173, ssa-miR-730a-2-3p, ssa-miR-730a-3p                                                                                                                                                                                                                                                                                                               |
| rs328504970              | T/A              | mse-miR-6095, bma-miR-9537                                                                                                                                                                                                                                                                                                                                     |
| rs341373326              | A/C              | pab-miR11509, dme-miR-969-5p, dsi-miR-969-5p, pla-miR11608                                                                                                                                                                                                                                                                                                     |
| rs321628309              | G/T              | sma-miR-8450-5p, sma-miR-8484-3p, mml-miR-3167-5p, rno-miR-544-5p, <b>gsa-miR-184b-5p</b> , dsi-miR-972-5p, hsa-miR-8076, cin-miR-4006f-3p                                                                                                                                                                                                                     |
| rs331148461              | C/G              | hsa-miR-6876-3p, eel-miR-11054-3p, mml-miR-892c-3p, gma-miR9736, ppc-miR-8304a-3p, hsa-miR-892c-3p                                                                                                                                                                                                                                                             |
| rs322683018              | C/T              | hsa-miR-6875-5p, lja-miR11089c-5p                                                                                                                                                                                                                                                                                                                              |
| rs325589387              | G/C              | gma-miR4367, stu-miR8048-5p, <b>hsa-miR-4780</b> , ath-miR4240, eun-miR159-5p, <b>rno-miR-345-5p, mmu-miR-345-5p</b> , atr-miR8585                                                                                                                                                                                                                             |
| rs334946646              | G/A              | stu-miR8028-5p, <b>hsa-miR-146b-5p, rno-miR-146b-5p, bta-miR-146b, cgr-miR-146b-5p, ggo-miR-146b, chi-miR-146b-5p, cja-miR-146b, pal-miR-146b-5p, dno-miR-146b-5p, ppa-miR-146b, mmr-miR-146b, nle-miR-146b, sbo-miR-146b, pha-miR-146b,ocu-miR-146b-5p</b>                                                                                                    |
| rs324915531              | C/T              | oan-miR-1421b-5p, hsa-miR-597-3p, gga-miR-7448-3p, sfr-miR-279c-5p, oan-miR-1421x-5p, nve-miR-2032a-3p, pte-miR-278b-5p                                                                                                                                                                                                                                        |
| rs81238514               | A/G              | <b>egr-miR-190-5p, emu-miR-190-5p, fhe-miR-190, mco-miR-190-3p</b>                                                                                                                                                                                                                                                                                             |
| rs342038820              | T/C              | sly-miR9473-5p, oni-miR-10929, <b>hsa-miR-511-5p, mml-miR-511-5p, ptr-miR-511, hsa-miR-3133, ppy-miR-511, cpo-miR-511-5p</b> , mmu-miR-701-3p                                                                                                                                                                                                                  |
| rs710773157              | -/GGAAAT         | gma-miR9764, hpo-miR-10050-5p                                                                                                                                                                                                                                                                                                                                  |
| NC_010459.5:g.17:5549043 | A/G              | <b>dno-miR-338-5p</b> , dse-miR-9685-3p                                                                                                                                                                                                                                                                                                                        |
| rs342038820              | T/C              | sly-miR9473-5p, oni-miR-10929, <b>hsa-miR-511-5p, mml-miR-511-5p, ptr-miR-511</b>                                                                                                                                                                                                                                                                              |
|                          |                  | <b>hsa-miR-3133, ppy-miR-511, cpo-miR-511-5p</b> , mmu-miR-701-3p                                                                                                                                                                                                                                                                                              |
| NC_010459.5:g.17:5549245 | T/AGT            | mdo-miR-12348-5p, gga-miR-1667-5p, bma-miR-5855                                                                                                                                                                                                                                                                                                                |
| rs703172161              | G/T              | sly-miR9473-5p, <b>hsa-miR-3133</b> , gsa-miR-8-3p                                                                                                                                                                                                                                                                                                             |
| rs1110718994             | CT/-             | cbr-miR-7580, hpo-miR-10043d-5p, nle-miR-4670, oan-miR-1422e-5p, <b>ssa-miR-26b-3p</b> , vvi-miR3638-3p                                                                                                                                                                                                                                                        |

Sequences were search for mature miRNA, E-value cut-off=10. Bold mutation were included in to association analysis in ZW pigs. **Bolded mutation** were subsequently used in the association study. **Bolded miRNA** are involved in the lipid metabolism changes and obesity, inducing: Insulin signaling pathway(hsa04910) - miR-146b-5p, miR-26b-3p, miR-3065-5p, miR-3133, miR-31-3p, miR-338-3p, miR-338-5p, miR-345-5p, miR-4686, miR-4780, miR-511; Maturity onset diabetes of the young (hsa04950) - miR-26b-3p, miR-3065-5p, miR-3133, miR-338-3p, miR-338-5p, miR-345-5p, miR-511; Type II diabetes mellitus (hsa04930) - miR-146b-5p, miR-26b-3p, miR-3065-5p, miR-3133, miR-31-3p, miR-338-3p, miR-338-5p, miR-345-5p, miR-4686, miR-4780, miR-511; Adipocytokine signaling pathway (hsa04920) - miR-3065-5p, miR-3133, miR-338-3p, miR-338-5p, miR-4686, miR-511

**Table S4.** The frequencies of alleles and genotypes of SNP and INDEL in 3'UTR of *FGL1* gene in Zlotnicka White and pigs active in Polish breeding

| Pig Breed          | Frequencies of rs340465447 (G/A) |           |               |        |      |                            | Frequencies of NC_010459.5:g.5548991-5548992del deletion (TCA/A) |           |          |        |      |                            |
|--------------------|----------------------------------|-----------|---------------|--------|------|----------------------------|------------------------------------------------------------------|-----------|----------|--------|------|----------------------------|
|                    | Genotype                         |           |               | Allele |      | HWE*<br>( <i>P</i> -value) | Genotype                                                         |           |          | Allele |      | HWE*<br>( <i>P</i> -value) |
|                    | AA                               | AG        | GG            | A      | G    |                            | TCA/TCA                                                          | TCA/A     | A/A      | TCA    | A    |                            |
| Zlotnicka White    | 0.36 (26)                        | 0.22(16)  | 0.42 (30)     | 0.47   | 0.53 | 0.000003                   | 0.43(31)                                                         | 0.44 (32) | 0.13 (9) | 0.65   | 0.35 | 0.637167                   |
| Polish Large White | 0 (0)                            | 0.01 (3)  | 0.99<br>(205) | 0.01   | 0.99 | 0.916565                   | 1 (208)                                                          | 0.0 (0)   | 0.0 (0)  | 1      | 0    | -                          |
| Polish Landrace    | 0.02 (7)                         | 0.09 (26) | 0.89<br>(259) | 0.14   | 0.86 | 0.000000                   | 0.96 (280)                                                       | 0.04 (12) | 0.00 (0) | 0.98   | 0.02 | 0.919542                   |
| Pulawska           | 0.0 (0)                          | 0.03 (5)  | 0.97<br>(173) | 0.01   | 0.99 | 0.849268                   | 1(178)                                                           | 0 (0)     | 0.00 (0) | 1      | 0    | -                          |
| Duroc              | 0.14 (10)                        | 0.17 (12) | 0.69 (50)     | 0.22   | 0.88 | 0.000011                   | 1 (72)                                                           | 0 (0)     | 0 (0)    | 1      | 0    | -                          |
| Total              | 0.05 (43)                        | 0.08 (62) | 0.87<br>(717) | 0.87   | 0.13 | 0.000000                   | 0.94 (769)                                                       | 0.05 (44) | 0.01 (9) | 0.87   | 0.13 | 0.000000                   |

\*HWE – Hardy-Weinberg Equilibrium: If *p*-value < 0.05 - not consistent with HWE, Not accurate if <5 individuals in any genotype group. In brackets number of individuals in the genotype group. Both SNPs rs340465447 (G/A) and rs330493983 (T/C) were 100% linked in the analysed individuals and both INDEL variants (NC\_010459.5:g.5548991-5548992del deletion or insertion NC\_010459.5:g.5549161insCAGCA).

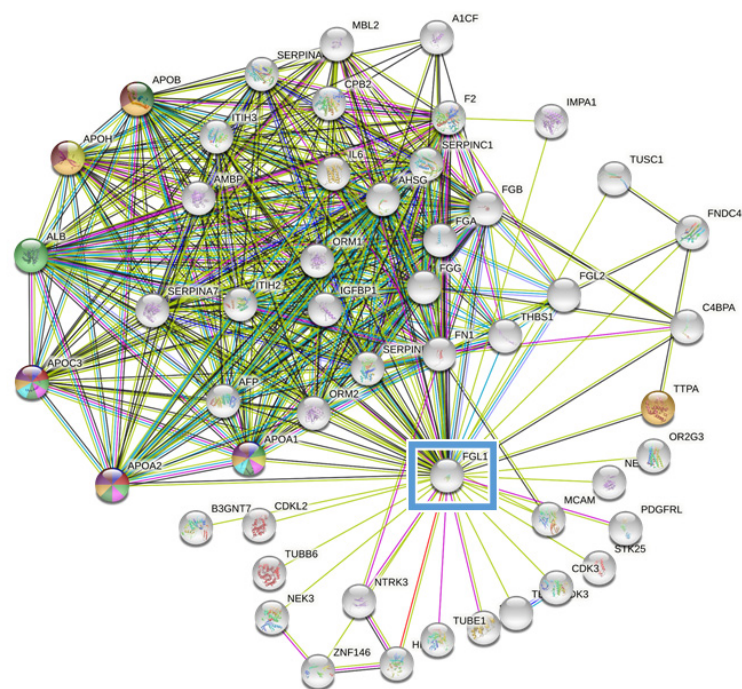

| Biological process |                                                                         |                  |          |          |        |
|--------------------|-------------------------------------------------------------------------|------------------|----------|----------|--------|
| GOterm             | description                                                             | Count in network | strength | FDR      | marker |
| GO:0010903         | Negative regulation of very-low density lipoprotein particle remodeling | 3 of 3           | 2.58     | 8.79e-06 |        |
| GO:0060621         | Negative regulation of cholesterol import                               | 2 of 2           | 2.58     | 0.00045  |        |
| GO:0034375         | High-density lipoprotein particle remodeling                            | 4 of 17          | 1.96     | 6.36e-06 |        |
| GO:0051006         | Positive regulation of lipoprotein lipase activity                      | 2 of 9           | 1.93     | 0.0026   |        |
| GO:0043691         | Reverse cholesterol transport                                           | 3 of 17          | 1.83     | 0.00023  |        |
| GO:0033344         | cholesterol efflux                                                      | 4 of 24          | 1.81     | 1.91e-05 |        |
| GO:0010896         | Regulation of triglyceride catabolic process                            | 2 of 12          | 1.81     | 0.0037   |        |
| GO:0006869         | Lipid transport                                                         | 6 of 272         | 0.93     | 0.00078  |        |
| Molecular function |                                                                         |                  |          |          |        |
| GO:0070653         | High-density lipoprotein particle receptor binding                      | 3 of 3           | 2.58     | 8.14e-06 |        |
| KEGG Pathway       |                                                                         |                  |          |          |        |
| hsa04979           | Cholesterol metabolism                                                  | 5 of 48          | 1.6      | 9.13e-06 |        |

**Figure S1.** Fgl1 and their interactions. By color are indicated the involvement of particular interactions in the biological process, molecular function and KEGG pathway associated with lipid metabolism. The protein interactions were generated by STRING: functional protein association networks. <https://string-db.org/>
